# Supplementary material for: Water properties and bottom water patterns in hadal trench environments
Source: Copernicus journal article supplement (doi:10.5194/os-20-123-2024), 2024-02-02
Supplement: Supplementary file 1 [file os-20-123-2024-supplement.pdf]

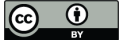

*Supplement of*

## **Water properties and bottom water patterns in hadal trench environments**

**Jessica Kolbusz et al.**

*Correspondence to:* Jessica Kolbusz ([jess.kolbusz@uwa.edu.au](mailto:jess.kolbusz@uwa.edu.au))

The copyright of individual parts of the supplement might differ from the article licence.

## Supplementary 1

Table S1. Deployment details

| <b>Trench</b>                | <b>Lander</b> | <b>Deployment Date</b> | <b>Depth (m)</b> | <b>Latitude (decimal degrees)</b> | <b>Longitude (decimal degrees)</b> |
|------------------------------|---------------|------------------------|------------------|-----------------------------------|------------------------------------|
| <b>South Sandwich Trench</b> | Flere         | 5 February 2019        | 8071±            | -57.54                            | -23.97                             |
|                              | Flere         | 10 February 2019       | 8254             | -55.23                            | -26.17                             |
| <b>Java Trench</b>           | Skaff         | 6 April 2019           | 6136             | -11.25                            | 114.92                             |
|                              | Skaff         | 5 April 2019           | 7197             | -11.13                            | 114.94                             |
|                              | Skaff         | 7 April 2019           | 6937             | -11.12                            | 114.93                             |
| <b>Kermadec Trench</b>       | Skaff         | 11 December 2021       | 9978             | -31.92                            | -177.26                            |
| <b>Tonga Trench</b>          | Skaff         | 5 June 2019            | 10811            | -23.27                            | -174.74                            |
|                              | Skaff         | 6 June 2019            | 7471             | -23.11                            | -174.40                            |
| <b>New Hebrides Trench</b>   | Skaff         | 4 December 2021        | 7960             | -23.12                            | 172.19                             |
| <b>Santa Cruz Trench</b>     | Skaff         | 29 November 2021       | 9370             | -11.25                            | 163.11                             |
| <b>Mariana Trench</b>        | Flere         | 27 April 2019          | 10865            | 11.37                             | 142.59                             |
|                              | Flere         | 28 April 2019          | 10543            | 11.36                             | 142.59                             |
|                              | Flere         | 29 April 2019          | 7495             | 11.08                             | 142.03                             |
|                              | Skaff         | 7 June 2020            | 10846            | 11.37                             | 142.42                             |
|                              | Skaff         | 9 June 2020            | 10922            | 11.37                             | 142.60                             |
| <b>Yap Trench</b>            | Closp         | 15 July 2022           | 5981             | 8.88                              | 138.16                             |
|                              | Closp         | 14 July 2022           | 8885             | 10.54                             | 138.69                             |
| <b>Palau Trench</b>          | Closp         | 18 July 2022           | 7995             | 7.80                              | 135.01                             |
| <b>Philippine Trench</b>     | Flere         | 23 February 2021       | 10068            | 9.47                              | 126.91                             |
|                              | Flere         | 24 February 2021       | 6995             | 10.29                             | 126.89                             |
|                              | Flere         | 27 February 2021       | 7023             | 11.50                             | 126.19                             |
| <b>Izu Ogasawara Trench</b>  | Closp         | 14 August 2022         | 8283             | 29.51                             | 143.07                             |
|                              | Closp         | 15 August 2022         | 8283             | 29.45                             | 142.58                             |
|                              | Flere         | 12 August 2022         | 6688             | 29.57                             | 142.98                             |
|                              | Flere         | 14 August 2022         | 7890             | 29.43                             | 143.04                             |
|                              | Flere         | 15 August 2022         | 8330             | 29.44                             | 142.59                             |
|                              | Skaff         | 15 August 2022         | 9752             | 29.46                             | 142.70                             |
|                              | Flere         | 24 August 2022         | 6503             | 34.24                             | 142.40                             |
| <b>Japan Trench</b>          | Flere         | 8 September 2022       | 6462             | 38.60                             | 143.95                             |
|                              | Skaff         | 8 September 2022       | 7491             | 38.59                             | 144.01                             |
|                              | Skaff         | 12 September 2022      | 7991             | 36.11                             | 142.71                             |
|                              | Flere         | 13 September 2022      | 6991             | 38.54                             | 144.19                             |
|                              | Skaff         | 13 September 2022      | 7452             | 38.46                             | 144.17                             |

Supplementary 2

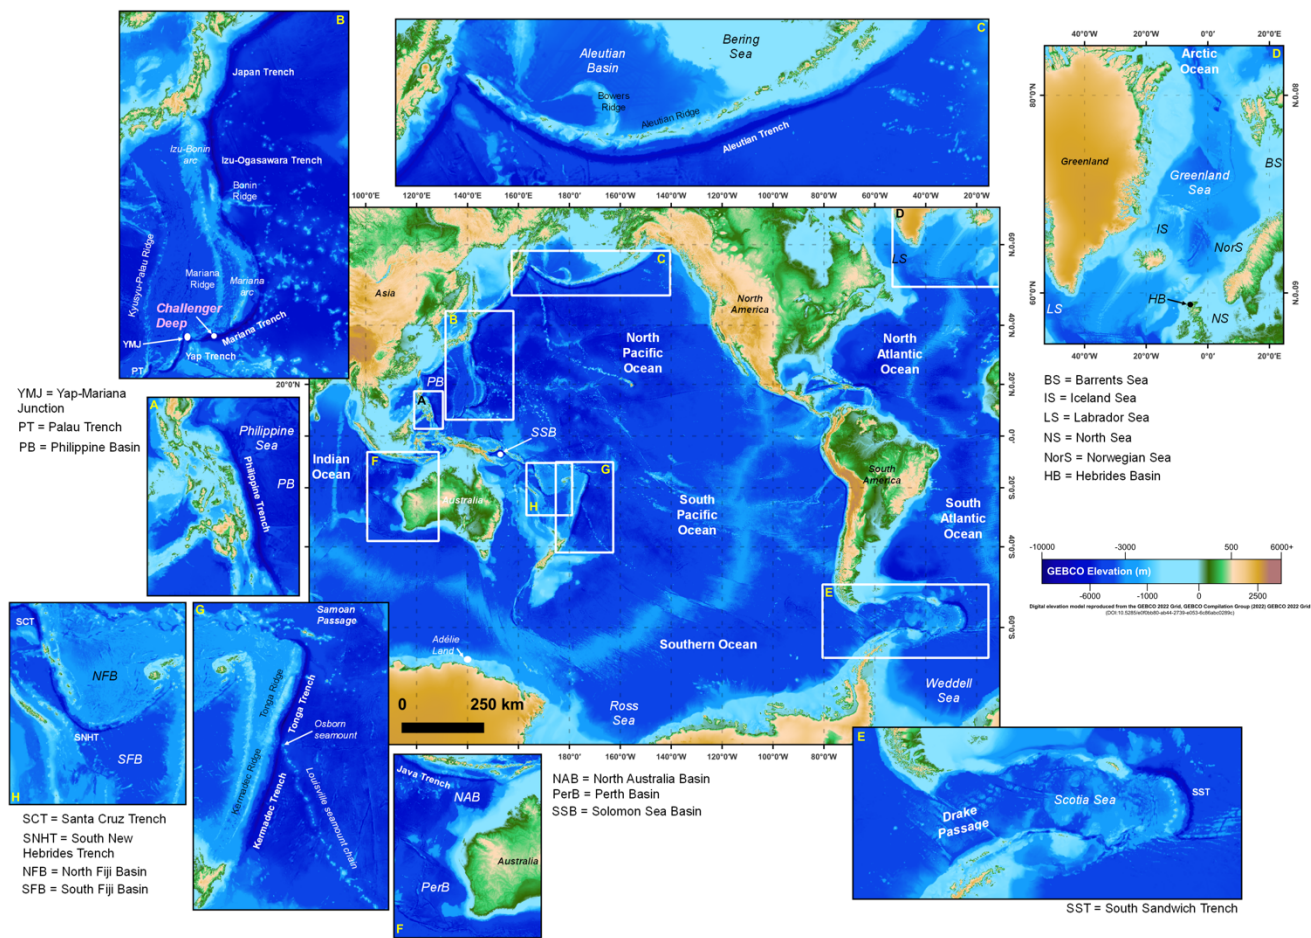

Figure S1. Bathymetry for locations mentioned in the paper using the GEBCO Elevations. Prepared by Devin Harrison from the British Geological Society for this publication.

The CTD profiles were examined conservatively on a case-by-case basis, similar to those completed for Argo profiles (Wong et al., 2022). The profile was rejected if the profile did not collapse onto a distinct deep water  $\Theta/S_A$  line. We refined trench profiles using nearby WOCE (World Ocean Circulation Experiment) profiles that had undergone stringent quality analysis measures within 4 years of the trench data collection. There is an example in the two figures. Only those WOCE profiles within  $\pm 8^\circ$  longitude and  $\pm 3^\circ$  latitude close proximity and deeper than 4000 dbar were selected. To correct the trench profiles, we firstly assessed their agreement of temperature profiles at pressures over 3500 dbar (Figure 1). This was followed by interpolation of the salinity values from the trench profiles to coincide with the salinity values of the WOCE profiles in the stable portion of the water column, ensuring consistency at the same temperature and pressure levels. This approach standardized the trench profiles based on high-quality WOCE data and in the absence of salinometer measurements.

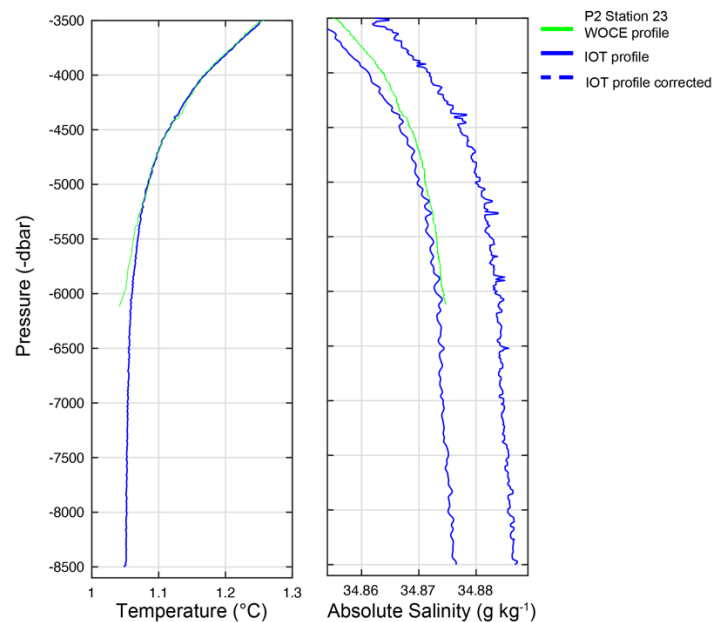

Figure S2. Conservative Temperature and Absolute Salinity profile for IOT Flere lander deployment on 15 August 2022

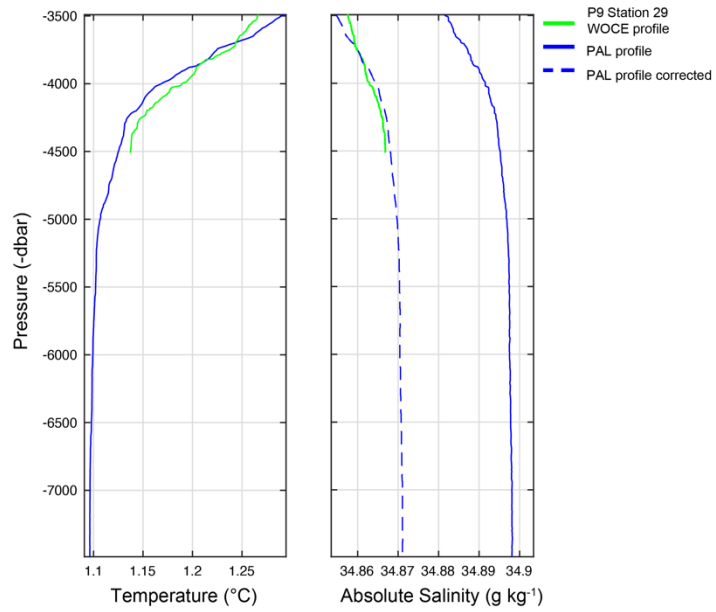

Figure S3. Conservative Temperature and Absolute Salinity profile for PAL Closp lander deployment on 18 July 2022

#### Supplementary 4

The following figures are Conservative Temperature ( $\Theta$ , °C) and Absolute Salinity ( $S_A$ , g kg<sup>-1</sup>) profiles for each location and deployment. Some profiles are omitted in the source water type analysis and discussion due to the physically improbable freshening of the water at the bottom of the profile. These are noted throughout the main text and figures, and the profiles are added here for a perspective of the data versus pressure.

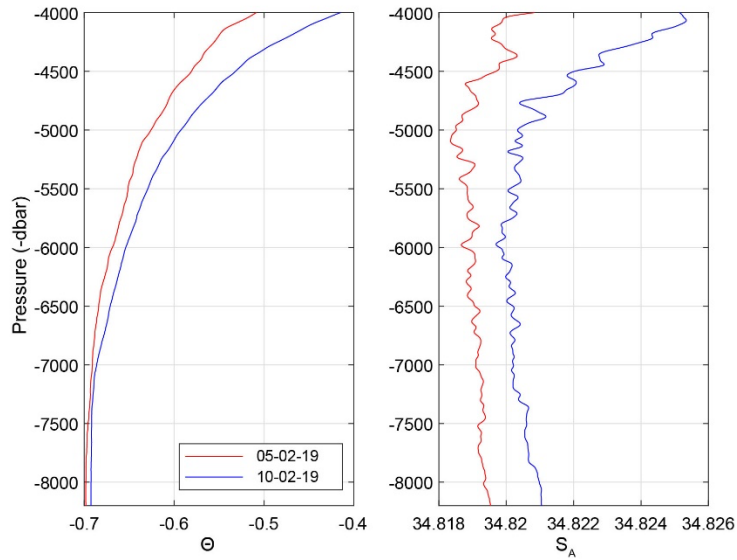

Figure S4. Conservative Temperature ( $\Theta$ , °C) and Absolute Salinity ( $S_A$ , g kg<sup>-1</sup>) profile from 4000 dbar to the seafloor for the South Sandwich Trench (SAND) deployments (see Table S1 for deployment locations)

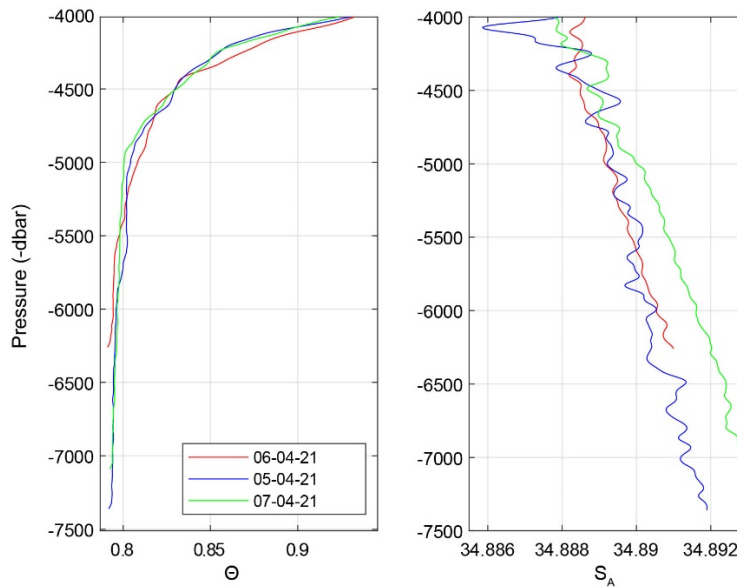

Figure S5. Conservative Temperature ( $\Theta$ , °C) and Absolute Salinity ( $S_A$ , g kg<sup>-1</sup>) profile from 4000 dbar to the seafloor for the Java Trench (JAV) deployments (see Table S1 for deployment locations)

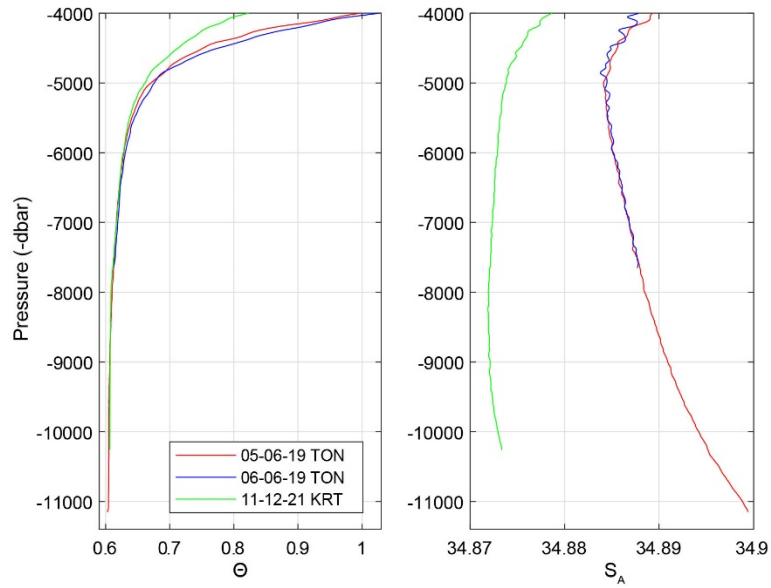

Figure S6. Conservative Temperature ( $\Theta$ , °C) and Absolute Salinity ( $S_A$ , g kg<sup>-1</sup>) profile from 4000 dbar to the seafloor for the Tonga (TON) and Kermadec (KRT) Trench deployments (see Table S1 for deployment locations)

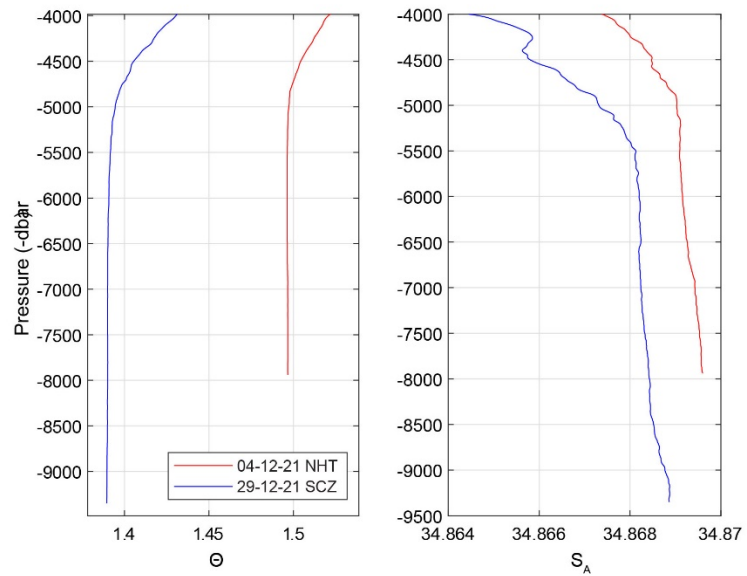

Figure S7. Conservative Temperature ( $\Theta$ , °C) and Absolute Salinity ( $S_A$ , g kg<sup>-1</sup>) profile from 4000 dbar to the seafloor for the New Hebrides (NHT) and Santa Cruz (SCZ) Trench deployments (see Table S1 for deployment locations)

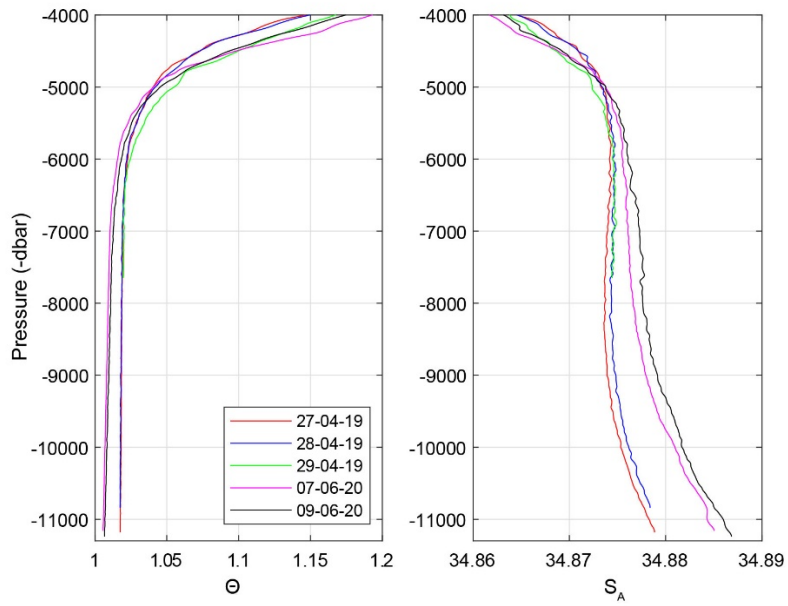

Figure S8. Conservative Temperature ( $\Theta$ ,  $^{\circ}\text{C}$ ) and Absolute Salinity ( $S_A$ ,  $\text{g kg}^{-1}$ ) profile from 4000 dbar to the seafloor for the Mariana Trench deployments (see Table S1 for deployment locations)

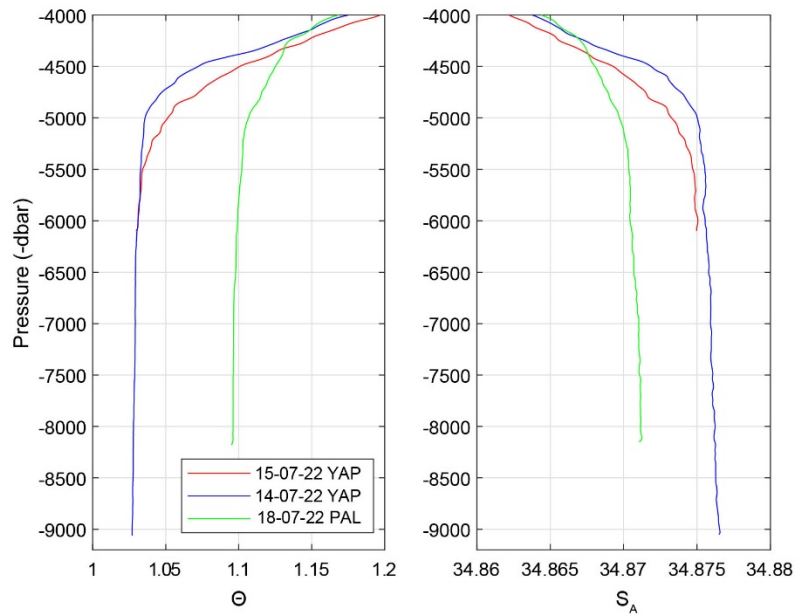

Figure S9. Conservative Temperature ( $\Theta$ ,  $^{\circ}\text{C}$ ) and Absolute Salinity ( $S_A$ ,  $\text{g kg}^{-1}$ ) profile from 4000 dbar to the seafloor for the Yap (YAP) and Palau (PAL) Trench deployments (see Table S1 for deployment locations)



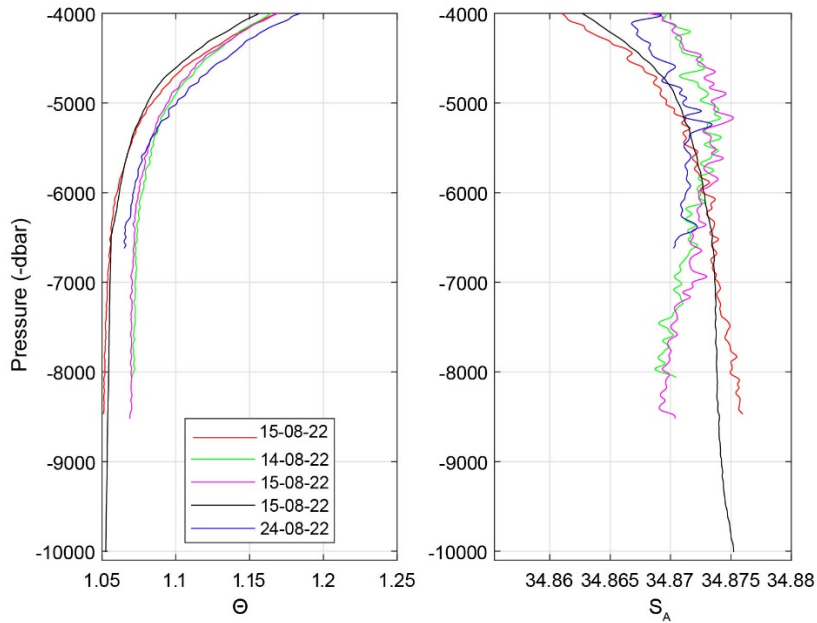

Figure S10. Conservative Temperature ( $\Theta$ ,  $^{\circ}\text{C}$ ) and Absolute Salinity ( $S_A$ ,  $\text{g kg}^{-1}$ ) profile from 4000 dbar to the seafloor for the Izu-Ogasawara (IOT) Trench deployments (see Table S1 for deployment locations)

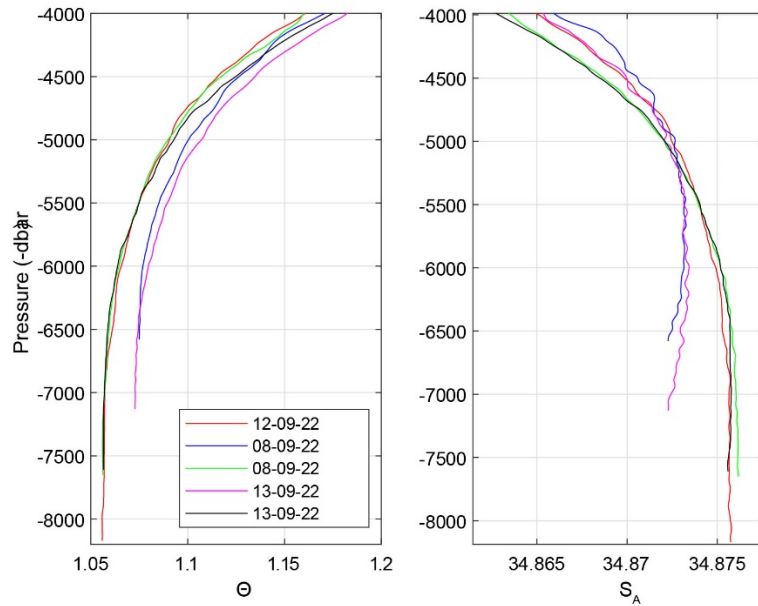

Figure S11. Conservative Temperature ( $\Theta$ ,  $^{\circ}\text{C}$ ) and Absolute Salinity ( $S_A$ ,  $\text{g kg}^{-1}$ ) profile from 4000 dbar to the seafloor for the Japan (JPT) Trench deployments (see Table S1 for deployment locations)
